# Supplementary material
Source: HighWire-hosted journal article supplement (https://bmjopen.bmj.com/content/12/9/e061344)
Supplement: inline-supplementary-material-5 [file inline-supplementary-material-5.pdf]

**Online supplemental appendix 5: Full descriptive statistics table by tested for SARS-CoV-2 and tested positive for SARS-CoV-2.**

|                                                        | Tested for SARS-CoV-2<br>% (n) | Not tested for SARS-CoV-2<br>% (n) | Tested positive for SARS-CoV-2<br>% (n) | Tested negative/not tested (unknown) for SARS-CoV-2<br>% (n) |
|--------------------------------------------------------|--------------------------------|------------------------------------|-----------------------------------------|--------------------------------------------------------------|
| <b>LINKED DATA</b>                                     |                                |                                    |                                         |                                                              |
| <b>Sample</b>                                          | 39.1% (2,764)                  | 60.9% (4,298)                      | 8.1% (569)                              | 91.9% (6,493)                                                |
| <b>Age at time of HAPPEN survey</b>                    | 10.1 ± 0.8                     | 9.9 ± 0.9                          | 10.1 ± 0.8                              | 9.9 ± 0.8                                                    |
| <b>Age on 01/03/2020 (start of period of interest)</b> | 10.6 ± 0.9                     | 10.3 ± 1.1                         | 10.6 ± 1.0                              | 10.4 ± 1.0                                                   |
| <b>Sex</b>                                             |                                |                                    |                                         |                                                              |
| <b>Boy</b>                                             | 49.3% (1,363)                  | 46.7% (2,005)                      | 44.3% (252)                             | 48.0% (3,116)                                                |
| <b>Girl</b>                                            | 48.9% (1,352)                  | 51.8% (2,226)                      | 54.5% (310)                             | 50.3% (3,268)                                                |
| <i>Missing</i>                                         | 1.8% (49)                      | 1.5% (67)                          | 1.2% (7)                                | 1.7% (109)                                                   |
| <b>WIMD 2019 quintiles</b>                             |                                |                                    |                                         |                                                              |
| <b>1 (most deprived)</b>                               | 24.3% (672)                    | 23.9% (1,025)                      | 28.5% (162)                             | 23.6% (1,535)                                                |
| <b>2</b>                                               | 19.9% (551)                    | 19.02% (826)                       | 19.7% (112)                             | 19.5% (1,265)                                                |
| <b>3</b>                                               | 16.5% (455)                    | 17.4% (748)                        | 17.6% (100)                             | 17.0% (1,103)                                                |
| <b>4</b>                                               | 15.6% (431)                    | 15.8% (678)                        | 14.1% (80)                              | 15.9% (1,029)                                                |
| <b>5 (least deprived)</b>                              | 18.0% (497)                    | 16.8% (771)                        | 16.5% (94)                              | 17.3% (1,124)                                                |
| <i>Missing</i>                                         | 5.7% (158)                     | 7.0% (300)                         | 3.7% (21)                               | 6.7% (437)                                                   |
| <b>HAPPEN SURVEY</b>                                   |                                |                                    |                                         |                                                              |

|                                        |                | Previous day  |               |             |               |
|----------------------------------------|----------------|---------------|---------------|-------------|---------------|
| <b>Ate breakfast</b>                   | <b>Yes</b>     | 93.0% (2,571) | 92.1% (3,797) | 93.4% (538) | 92% (6,012)   |
|                                        | <b>No</b>      | 7% (193)      | 7.3% (319)    | 5.6% (31)   | 7.3% (481)    |
|                                        | <i>Missing</i> | 0%            | 0%            | 0%          | 0%            |
| <b>Active travel to school</b>         | <b>Yes</b>     | 38.5% (1,065) | 39.8% (1,710) | 37.6% (214) | 39.4% (2,561) |
|                                        | <b>No</b>      | 61.5% (1,699) | 60.2% (2,588) | 62.4% (355) | 60.6% (3,932) |
|                                        | <i>Missing</i> | 0%            | 0%            | 0%          | 0%            |
| <b>Active travel from school</b>       | <b>Yes</b>     | 43.0% (1,187) | 43.0% (1,846) | 42.4% (241) | 43.0% (2,792) |
|                                        | <b>No</b>      | 57.0% (1,577) | 57.0% (2,452) | 57.6% (328) | 57.0% (3,701) |
|                                        | <i>Missing</i> | 0%            | 0%            | 0%          | 0%            |
| <b>Toothbrush continuous</b>           | <b>0</b>       | 3.3% (91)     | 3.4% (146)    | 1.9% (11)   | 3.5% (227)    |
|                                        | <b>1</b>       | 20.0% (552)   | 21.0% (903)   | 18.6% (106) | 20.6% (1,358) |
|                                        | <b>2</b>       | 67.1% (1,854) | 65.2% (2,802) | 69.6% (396) | 65.2% (4,294) |
|                                        | <b>3</b>       | 9.6% (265)    | 10.3% (446)   | 9.5% (54)   | 10.0% (659)   |
|                                        | <i>Missing</i> | 0.1% (<5)     | <0.1% (<5)    | 0.4% (<5)   | <0.1% (<5)    |
|                                        | <b>0</b>       | 14.3% (395)   | 15.3% (657)   | 12.5% (71)  | 15.1% (981)   |
| <b>Fruit/veg portions (continuous)</b> | <b>1</b>       | 16.1% (445)   | 17.4% (749)   | 15.8% (90)  | 17.0% (1,104) |
|                                        | <b>2</b>       | 17.7% (489)   | 17.5% (754)   | 19.5% (111) | 17.4% (1,132) |
|                                        | <b>3</b>       | 17.5% (484)   | 16.5% (711)   | 16.7% (95)  | 16.9% (1,110) |
|                                        | <b>4</b>       | 12.7% (351)   | 11.9% (510)   | 13.5% (77)  | 12.1% (784)   |
|                                        | <b>5</b>       | 10.5% (291)   | 10.6% (455)   | 11.8% (67)  | 10.4% (679)   |
|                                        | <b>6</b>       | 4.5% (123)    | 4.3% (186)    | 2.8% (16)   | 4.5% (293)    |
|                                        | <b>7</b>       | 2.3% (63)     | 2.1% (92)     | 4.2% (24)   | 2.0% (131)    |
|                                        | <b>8</b>       | 4.5% (123)    | 4.3% (184)    | 3.2% (18)   | 4.5% (289)    |
|                                        | <i>Missing</i> | 0%            | 0%            | 0%          | 0%            |

|                                                         |                 |             |               |             |               |
|---------------------------------------------------------|-----------------|-------------|---------------|-------------|---------------|
| <b>Sleep hours</b>                                      |                 | 9.4 ± 1.6   | 9.4 ± 1.6     | 9.4 ± 1.6   | 9.4 ± 1.6     |
| <b>Number of days physically active ≥ 60 minutes</b>    | <b>0</b>        | 6.5% (179)  | 7.9% (339)    | 4.0% (23)   | 7.6% (495)    |
|                                                         | <b>1-2 days</b> | 27.9% (772) | 29.0% (1,246) | 27.8% (158) | 28.7% (1,860) |
|                                                         | <b>3-4 days</b> | 27.5% (761) | 26.2% (1,128) | 30.9% (176) | 26.4% (1,712) |
|                                                         | <b>5-6 days</b> | 18.3% (505) | 17.0% (731)   | 18.1% (103) | 17.5% (1,133) |
|                                                         | <b>7 days</b>   | 19.8% (557) | 19.9% (854)   | 19.2% (109) | 19.9% (1,292) |
|                                                         | <i>Missing</i>  | 0%          | 0%            | 0%          | 0%            |
| <b>Number of days sedentary/screen time ≥ two hours</b> | <b>0</b>        | 5.2% (144)  | 6.1% (262)    | 5.5% (31)   | 5.8% (375)    |
|                                                         | <b>1-2 days</b> | 24.2% (674) | 23.5% (1,011) | 24.8% (141) | 23.8% (1,544) |
|                                                         | <b>3-4 days</b> | 21.7% (599) | 20.6% (886)   | 21.1% (120) | 21.0% (1,365) |
|                                                         | <b>5-6 days</b> | 14.0% (386) | 13.8% (593)   | 13.9% (79)  | 13.9% (900)   |
|                                                         | <b>7 days</b>   | 34.8% (961) | 36.0% (1,546) | 34.8% (198) | 35.6% (2,309) |
|                                                         | <i>Missing</i>  | 0%          | 0%            | 0%          | 0%            |
| <b>Number of days tired</b>                             | <b>0</b>        | 21.0% (582) | 21.0% (903)   | 19.2% (109) | 21.2% (1,376) |
|                                                         | <b>1-2 days</b> | 32.4% (895) | 32.0% (1,377) | 35.7% (203) | 31.9% (2,069) |
|                                                         | <b>3-4 days</b> | 17.6% (487) | 17.5% (754)   | 18.8% (107) | 17.5% (1,134) |
|                                                         | <b>5-6 days</b> | 10.0% (276) | 9.3% (399)    | 10.5% (60)  | 9.5% (615)    |
|                                                         | <b>7 days</b>   | 19.0% (524) | 20.1% (865)   | 15.8% (90)  | 20.0% (1,299) |
|                                                         | <i>Missing</i>  | 0%          | 0%            | 0%          | 0%            |
| <b>Number of days sugary snack</b>                      | <b>0</b>        | 6.5% (179)  | 7.7% (332)    | 6.3% (36)   | 7.3% (475)    |
|                                                         | <b>1-2 days</b> | 34.9% (964) | 32.7% (1,407) | 35.0% (199) | 33.5% (2,172) |
|                                                         | <b>3-4 days</b> | 25.3% (698) | 26.7% (1,146) | 25.1% (143) | 26.2% (1,701) |
|                                                         | <b>5-6 days</b> | 13.4% (371) | 12.0% (515)   | 15.3% (87)  | 12.3% (799)   |
|                                                         | <b>7 days</b>   | 20.0% (552) | 20.9% (898)   | 18.3% (104) | 20.7% (1,346) |

|                                      | <i>Missing</i> | <i>0%</i>     | <i>0%</i>     | <i>0%</i>   | <i>0%</i>     |
|--------------------------------------|----------------|---------------|---------------|-------------|---------------|
|                                      | <b>General</b> |               |               |             |               |
| <b>Number of out of school clubs</b> | <b>0</b>       | 27.7% (766)   | 32.3% (1,387) | 25.1% (143) | 31.0% (2,010) |
|                                      | <b>1</b>       | 17.9% (495)   | 16.9% (726)   | 16.0% (91)  | 17.4% (1,130) |
|                                      | <b>2</b>       | 16.0% (443)   | 15.1% (650)   | 14.9% (85)  | 15.5% (1,008) |
|                                      | <b>3</b>       | 11.1% (308)   | 10.4% (446)   | 13.3% (76)  | 10.4% (678)   |
|                                      | <b>4</b>       | 7.4% (204)    | 7.3% (313)    | 7.6% (43)   | 7.3% (474)    |
|                                      | <b>5</b>       | 6.2% (171)    | 5.8% (251)    | 5.8% (33)   | 6.0% (389)    |
|                                      | <b>6</b>       | 3.4% (95)     | 2.5% (109)    | 5.1% (29)   | 2.7% (175)    |
|                                      | <b>7</b>       | 3.3% (91)     | 2.5% (107)    | 5.1% (29)   | 2.6% (169)    |
|                                      | <b>8</b>       | 1.1% (29)     | 0.8% (33)     | 1.8% (10)   | 0.8% (52)     |
|                                      | <b>9</b>       | 0.9% (24)     | 0.7% (32)     | 1.2% (7)    | 0.8% (49)     |
|                                      | <b>10</b>      | 3.9% (107)    | 4.0% (174)    | 3.3% (19)   | 4.0% (262)    |
|                                      | <i>Missing</i> | 1.1% (31)     | 1.6% (70)     | 0.7% (<5)   | 1.5% (97)     |
| <b>Can ride a bike</b>               | <b>Yes</b>     | 88.8% (2,444) | 86.0% (3,696) | 91.4% (520) | 86.7% (5,641) |
|                                      | <b>No</b>      | 11.2% (309)   | 14.0% (602)   | 8.6% (49)   | 13.3% (862)   |
|                                      | <i>Missing</i> | 0%            | 0%            | 0%          | 0%            |
| <b>Can swim 25m</b>                  | <b>Yes</b>     | 78.9% (2,180) | 72.9% (3,134) | 80.3% (457) | 74.8% (4,857) |
|                                      | <b>No</b>      | 21.1% (584)   | 27.1% (1,164) | 19.7% (112) | 25.2% (1,636) |
|                                      | <i>Missing</i> | 0%            | 0%            | 0%          | 0%            |
